# Supplementary material for: Drowning and aquatic injuries dictionary
Source: PubMed Central journal article supplement — Resusc Plus. 2021 Jan 20;5:100072. doi: 10.1016/j.resplu.2020.100072 (PMC8244532; doi:10.1016/j.resplu.2020.100072), 2021-01-20
Supplement: mmc1.pdf [file mmc1.pdf]

## COMPLEMENTARY MATERIAL 1 – List of abbreviations & acronyms included in the Drowning & Aquatic Injuries Dictionary

ABC - Airway – Breathing – Circulation  
ACLS - Advanced Cardiac Life Support  
AED - Automated External Defibrillator  
ALS - Advanced Life Support  
APE – Acute Pulmonary Edema  
ARDS - Acute Respiratory Distress Syndrome  
AVIR - Aquatic Victim-Instead-of-Rescuer syndrome  
BAC - Blood Alcohol Concentration  
BCD – Buoyancy Control Device  
BLS - Basic Life Support  
BVM – Bag-valve-mask  
CAB - Circulation – Airway – Breathing  
CA - Cardiac Arrest  
CCO-CPR or CO-CPR - Chest-Compression-Only or Compression Only CPR  
CPA - Cardiopulmonary Arrest  
CO<sub>2</sub> - Carbon Dioxide  
CPC - Cerebral Performance Category  
CPR – Cardiopulmonary Resuscitation  
CSI - Cervical Spine Injury  
DALY - Disability-Adjusted Life Year  
DNR - Do Not Resuscitate  
EAP - Emergency Action Plan  
ECLS - Extracorporeal Life Support  
ECMO - Extracorporeal Membrane Oxygenation  
EMS - Emergency Medical Services  
EMT - Emergency Medicine Technician  
ER - Emergency Room  
ED - Emergency Department  
FA – First Aid  
FBAO – Foreign Body Airway Obstruction  
ICD - International Classification of Disease  
ILCOR - International Liaison Committee on Resuscitation  
IRB - Inflatable Rescue Boat  
IWR In-Water Resuscitation  
MD – Medical Doctor  
O<sub>2</sub> - Oxygen  
OHCA – Out-of-hospital Cardiac Arrest  
OHCA-D - Out of hospital Cardiac Arrest due to Drowning  
PA - Public Address System  
PCO<sub>2</sub> - Carbon Dioxide Pressure  
PEEP - Positive End-Expiratory Pressure  
PFD - Personal flotation device  
PTSD – Post Traumatic Stress Disorder  
PO<sub>2</sub> - Oxygen Pressure  
PPE - Personal Protective Equipment  
PSE - Public Safety Equipment  
PWC – Personal Watercraft  
ROSC - Return of Spontaneous Circulation  
RWC - Rescue Watercraft  
SAR - Search and Rescue  
SPF - Sun Protector Factor  
SpO<sub>2</sub> - Peripheral oxygen saturation  
TAD – Towable Accessory Device  
UAS - Unmanned Aircraft system  
UAV - Unmanned Aerial Vehicle  
YO – Years Old
